# Supplementary material for: Virus-induced cochlear inflammation in newborn mice alters auditory function
Source: JCI journal article supplement (doi:10.1172/jci.insight.128878), 2019-09-04
Supplement: sd1 [file 1]

# Supplemental Material

1  
2  
3  
4  
5  
6  
7  
8  
9  
10  
11  
12  
13  
14  
15  
16  
17  
18  
19  
20  
21

Supplemental Table 1. Primary Antibodies used in this Study

| Antigen                  | Species | Clone      | Dilution | Company                   | Catalog # |
|--------------------------|---------|------------|----------|---------------------------|-----------|
| MyosinVIIa (H-60)        | Rabbit  | Polyclonal | 1:300    | Santa Cruz                | Sc-25834  |
| SOX2(E-4)                | Mouse   | IgG1       | 1:300    | Santa Cruz                | Sc-365823 |
| CtBP2                    | Mouse   | IgG1       | 1:300    | BD Biosciences            | 612044    |
| GluR2(6C4)               | Mouse   | IgG2a      | 1:300    | Millipore                 | MAB397    |
| NF-H                     | Chicken | Polyclonal | 1:1000   | Millipore                 | AB5539    |
| Tuj-1                    | Mouse   | IgG2a      | 1:1500   | Biologend (prev. Covance) | 801202    |
| MCMV IE-1 (pp89)         | Mouse   | IgG1       | 1:100    | lab generated             | Croma101  |
| Iba1                     | Rabbit  | Polyclonal | 1:300    | Wako                      | 019-19741 |
| Cleaved caspase-3 (D175) | Rabbit  | Polyclonal | 1:200    | Cell Signaling            | 9961S     |

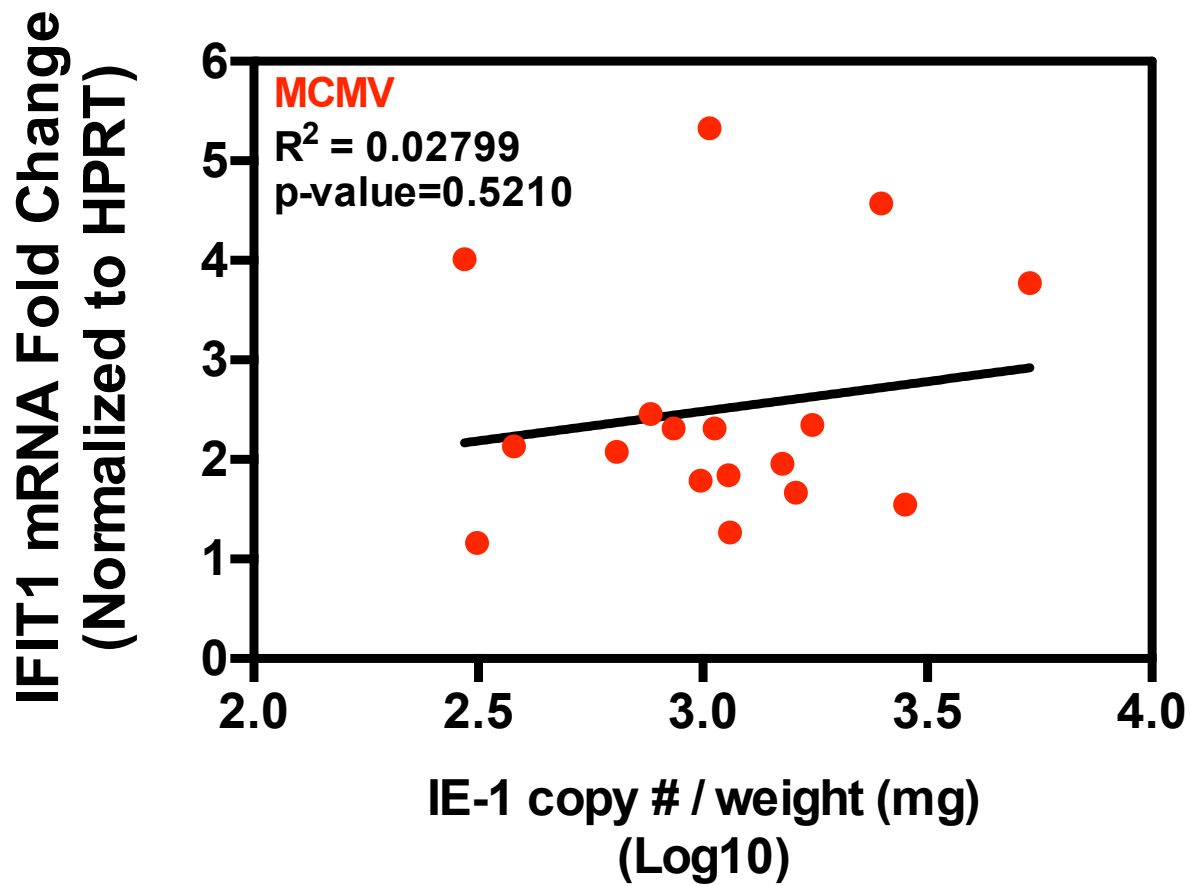

22

23

24 **Supplemental Figure 1. IFIT1 expression and MCMV genome copy number in individual cochlea.**  
 25 IFIT1 expression plotted as function of IE-1 copy number. Linear regression line analysis was performed  
 26 and p-value, as a test for linear trend, is shown. Note there was no correlation between IFIT1 expression  
 27 and viral load.

28

29

30

31

32

33

34

35

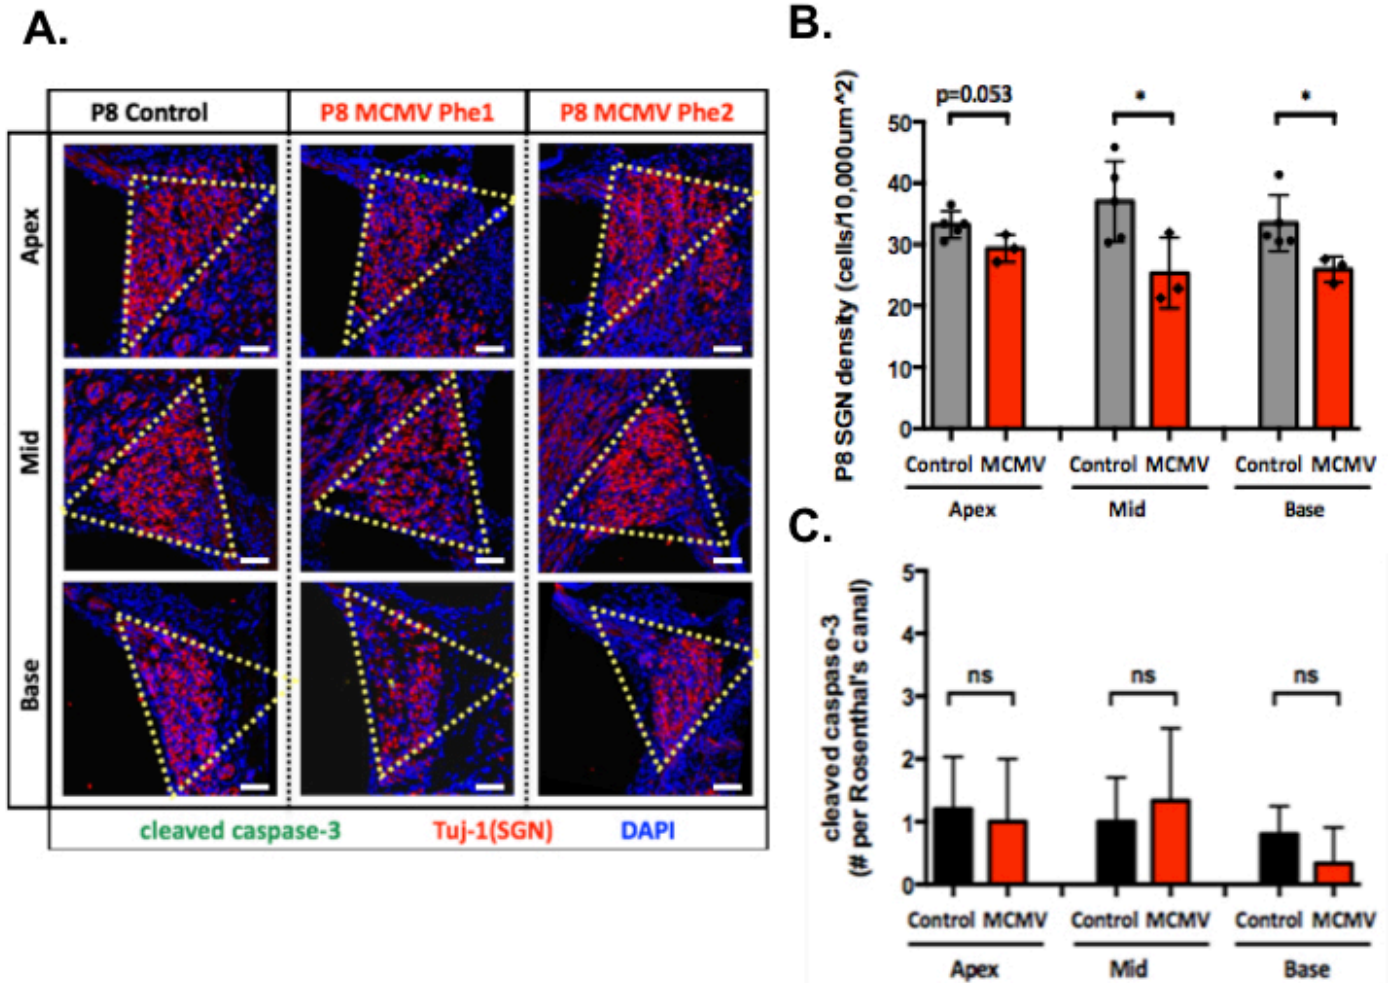

36

37 **Supplemental Figure 2. SGN loss in MCMV infected mice.** PNd8 cochlear sections from non-infected,  
 38 control and MCMV infected (500 PFU) mice were stained for Tuj-1 to detect SGNs and cleaved caspase-3.  
 39 Stained sections were imaged with confocal microscope at 40X magnification. **(A)** Representative confocal  
 40 images of the cochlea stained for Tuj-1 displaying the three regions of the Rosenthal's canal. **(B)**  
 41 Quantification of SGN was normalized to the areas of Rosenthal's canal to provide SGN density  
 42 (cells/10,000µm<sup>2</sup>) in the three cochlear regions. **(C)** Number of cleaved caspase-3 expressing cells in  
 43 control and infected mice. Cleaved caspase-3 positive cells in the Rosenthal's canal are shown as mean  
 44 ± SD, n=3 mice/ 6 cochlea per experimental group. P-values were calculated using standard two-tailed t  
 45 test. Data are representative of two independent experiments. Scale bars: 40µm

46

47

48

49

50

51

52

53

54

55  
56  
57  
58  
59  
60  
61  
62  
63  
64  
65  
66  
67  
68  
69  
70  
71  
72  
73  
74  
75  
76  
77  
78

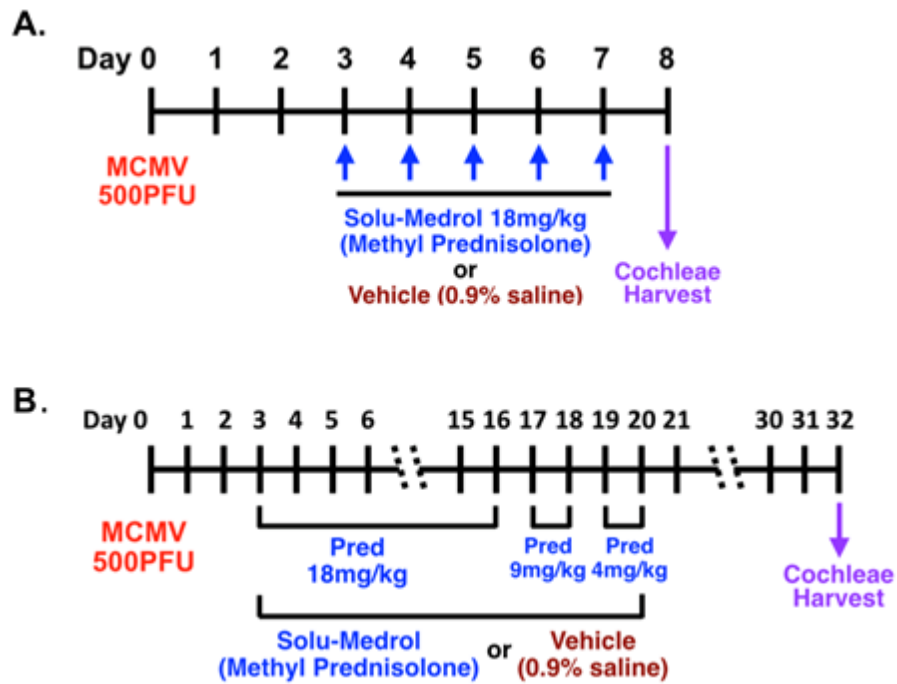

**Supplemental Figure 3. Schematic representation of methylprednisolone treatment protocols. (A)** Short duration (PNd 3-7) and (B) extended (PNd 3-20).

79  
80  
81  
82  
83  
84  
85  
86  
87

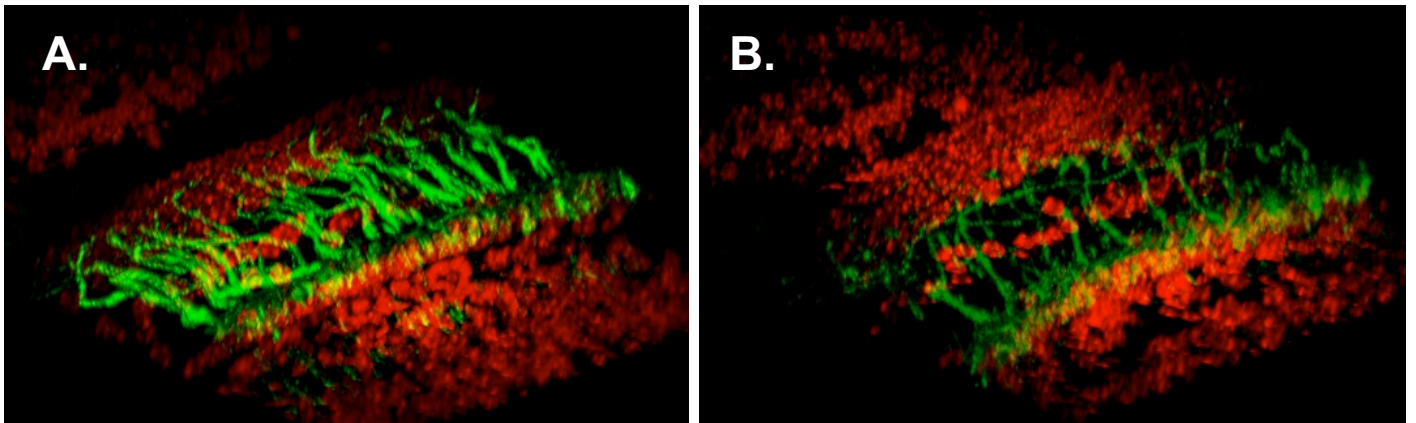

**Supplemental Figure 4. Loss of neurites in cochlea of infected mice.** Mid-apical regions of cochlear whole mounts from (A) PNd32 non-infected, control mice and (B) mice infected with 500 PFU MCMV as newborns were stained for neurofilaments (NF-H) and nuclear stain, Hoechst dye (red), as described in Figure 5 and imaged by confocal microscopy. z-stacked images were viewed tangentially to demonstrate the neurofilaments (green) extending into the OHCs.
